# Supplementary material for: Correlation Network Analysis Reveals Relationships between MicroRNAs, Transcription Factor T-bet, and Deregulated Cytokine/Chemokine-Receptor Network in Pulmonary Sarcoidosis
Source: Mediators Inflamm. 2015 Nov 30;2015:121378. doi: 10.1155/2015/121378 (PMC4677216; doi:10.1155/2015/121378)
Supplement: Supplementary file 1 — Correlation network analysis reveals relationships between microRNAs, transcription factor T-bet and deregulated cytokine/chemokine-receptor network in pulmonary sarcoidosis [file 121378.f1.zip]

Archive with 2 entries (2 files):
- 121378.f1.docx
- description.docx
